## Basal ganglia and cortical control of thalamic rebound spikes

Mohammadreza Mohagheghi Nejad<sup>1,2</sup>, Stefan Rotter<sup>1</sup>, Robert Schmidt<sup>3</sup>

<sup>1</sup>*Bernstein Center Freiburg & Faculty of Biology, University of Freiburg, 79104 Freiburg, Germany*

<sup>2</sup>*Department of Computational Science and Technology, School of Electrical Engineering and Computer Science, KTH Royal Institute of Technology, 100 44 Stockholm, Sweden*

<sup>3</sup>*Department of Psychology, University of Sheffield, S1 2LT Sheffield, United Kingdom*

**Abbreviated title:** Basal ganglia control of thalamic rebound spikes

**Corresponding Author:**

Mohammadreza M. Nejad, Bernstein Center Freiburg, University of Freiburg, Hansastrasse 9A, 79104 Freiburg, Germany. Email: m.mohaghegh@gmail.com

**Number of pages:** 49

**Number of figures:** 6

**Number of tables:** 1

**Number of words Abstract:** 232

**Keywords (up to 5):** Parkinson's disease, Higher-order correlations, Nigrothalamic transmission, Active decorrelation, Nigral sensory responses

1 **Abstract**

2 Basal ganglia output neurons transmit motor signals by decreasing their firing rate during movement.  
3 This decrease can lead to post-inhibitory rebound spikes in thalamocortical neurons in motor  
4 thalamus. While in healthy animals neural activity in the basal ganglia is markedly uncorrelated,  
5 in Parkinson's disease neural activity becomes pathologically correlated. Here we investigated the  
6 impact of correlations in the basal ganglia output on the transmission of motor signals to motor  
7 thalamus using a Hodgkin-Huxley model of a thalamocortical neuron. We found that correlations in  
8 the basal ganglia output disrupt the transmission of motor signals via rebound spikes by decreasing  
9 the signal-to-noise ratio and increasing the trial-to-trial variability. We further examined the role of  
10 brief sensory responses in basal ganglia output neurons and the effect of cortical excitation of motor  
11 thalamus in modulating rebound spiking. Interestingly, both the sensory responses and cortical  
12 inputs could either promote or suppress the generation of rebound spikes depending on their timing  
13 relative to the motor signal. Finally, in the model rebound spiking occurred despite the presence  
14 of moderate levels of excitation, indicating that rebound spiking might be feasible in a parameter  
15 regime relevant also in vivo. Overall, our model provides novel insights into the transmission of  
16 motor signals from the basal ganglia to motor thalamus by suggesting new functional roles for  
17 active decorrelation and sensory responses in the basal ganglia, as well as cortical excitation of  
18 motor thalamus.

## 19 **Introduction**

20 The basal ganglia have long been implicated in the selection and execution of voluntary movements  
21 (Albin et al., 1989; Alexander and Crutcher, 1990b; Redgrave et al., 1999; Hikosaka et al., 2000).  
22 Classic “box-and-arrow” models of the basal ganglia (Alexander and Crutcher, 1990a; Wichmann  
23 and DeLong, 1996) presume a propagation of motor signals through the direct pathway. The direct  
24 pathway consists of direct, inhibitory projections from the striatum to the basal ganglia output  
25 regions. Therefore increased activity in the striatum reduces the activity e.g. in the substantia nigra  
26 pars reticulata (SNr). SNr in turn disinhibits the motor thalamus (Deniau and Chevalier, 1985),  
27 and thereby enables movement. Basal ganglia output neurons often have high baseline firing rates  
28 and decrease their rate during movement in both rodents and primates (Hikosaka and Wurtz, 1983;  
29 Schultz, 1986; Leblois et al., 2007; Schmidt et al., 2013). However, recent studies have suggested  
30 a more complex picture on how basal ganglia output affects motor thalamus and motor cortex  
31 (Bosch-Bouju et al., 2013; Goldberg et al., 2013).

32 Three different modes have been proposed for how the basal ganglia output can affect thalamic  
33 targets (Goldberg et al., 2013). In the first mode sudden pauses in basal ganglia inhibition of  
34 thalamus lead to “rebound” spikes in thalamocortical neurons due to their intrinsic T-type  $\text{Ca}^{2+}$   
35 channels (Llinás and Jahnsen, 1982). Release from long-lasting hyperpolarisation (e.g. during  
36 movement) de-inactivates the T-type  $\text{Ca}^{2+}$  channels and thereby depolarises the membrane  
37 potential. For strong enough preceding hyperpolarisation, the membrane potential can even reach  
38 the spike threshold without any excitation (Person and Perkel, 2005; Person and Perkel, 2007;

39 Leblois et al., 2009; Kim et al., 2017). However, thalamocortical neurons also receive excitatory  
40 input from cortex, which can change the effect of nigrothalamic inhibition. For moderate levels of  
41 cortical excitation the nigrothalamic transmission operates in a disinhibition mode, in which the  
42 basal ganglia effectively gate cortical excitation, so that during pauses of inhibition the excitatory  
43 inputs can evoke spikes in the thalamocortical neuron (Kojima and Doupe, 2009; Bosch-Bouju et  
44 al., 2014; Edgerton and Jaeger, 2014). If the cortical excitation is strong enough, the inhibition  
45 from the basal ganglia no longer prevents action potentials in the thalamocortical neurons, but  
46 instead controls their timing. In this “entrainment” mode the thalamocortical neuron spikes  
47 after the inhibitory input spikes from SNr with a short, fixed latency (Goldberg and Fee, 2012;  
48 Goldberg et al., 2012).

49 One prominent feature of the basal ganglia network is that neurons fire in an uncorrelated fashion,  
50 despite their overlapping dendritic fields and local recurrent connections (Wilson, 2013). Specific  
51 features of the basal ganglia such as pacemaking neurons and high firing rate heterogeneity may  
52 act as mechanisms for active decorrelation of activity. This effectively prevents correlations among  
53 neurons, and disrupting this mechanism leads to pathologically correlated activity as in Parkinson’s  
54 disease (Bar-Gad et al., 2003; Wilson, 2013). Increased correlated activity has also been observed  
55 in basal ganglia output neurons in Parkinson’s disease (Bergman et al., 1998), which can in  
56 turn increase correlated activity in the thalamus (Reitsma et al., 2011). Previous computational  
57 modelling has shown that pathological basal ganglia output can prevent the thalamic relaying of  
58 cortical excitatory signals (Guo et al., 2008). Here we examined how pathological correlations

59 in the basal ganglia output affect the transmission of motor signals from the basal ganglia to the  
60 thalamus and how this transmission is affected by cortical excitation. In addition to transmitting  
61 motor signals, basal ganglia output neurons may also be involved in further sensory and cognitive  
62 processing. For example, SNr neurons also respond to salient sensory stimuli instructing the  
63 initiation or stopping of movements (Pan et al., 2013; Schmidt et al., 2013). Therefore, we also  
64 investigated how these sensory responses may affect the motor transmission.

65 In the present study we used computational modelling to study the transmission from the basal  
66 ganglia to the thalamus via postinhibitory rebound spikes. We found that uncorrelated basal  
67 ganglia output ensures a clear transmission of motor commands with low trial-to-trial variability  
68 in the thalamic response latency. In contrast, pathological correlations in SNr led to a noisy  
69 transmission with high trial-to-trial variability. In addition, we found that sensory responses in  
70 SNr can, depending on their timing relative to the movement-related decrease, either facilitate or  
71 suppress rebound spikes leading to promote or suppress movement. Therefore, in the rebound  
72 transmission mode, uncorrelated activity and sensory responses in the basal ganglia output have  
73 functional roles in the coordinated transmission of motor signals. Finally, we found that the  
74 rebound spiking mode persisted in the presence of excitation that is strong enough to maintain  
75 baseline firing rates reported in vivo (Bosch-Bouju et al., 2014).

## 76 **Materials and Methods**

### 77 *Model neuron*

78 In this study we used a Hodgkin-Huxley type model of a thalamocortical neuron (Rubin and  
 79 Terman, 2004). The model has four different ionic currents: a leak current ( $I_L$ ), a Na<sup>+</sup> current  
 80 ( $I_{Na}$ ), a K<sup>+</sup> current ( $I_K$ ), and a T-type Ca<sup>2+</sup> current ( $I_T$ ), which are determined by the membrane  
 81 potential  $v$ , the channel conductances  $g$  and reversal potentials  $E$ . While the conductance of the  
 82 leak current  $g_L$  is constant, the conductance of the Na<sup>+</sup>, K<sup>+</sup> and T-type Ca<sup>2+</sup> currents depends on  
 83 the membrane potential and varies over time. These voltage-dependent conductances are formed  
 84 by the product of the maximum channel conductance ( $g_{Na}$ ,  $g_K$  and  $g_{Ca}$ ) and the voltage-dependent  
 85 (in)activation variables ( $m$ ,  $h$ ,  $p$  and  $r$ ).

86 The model neuron's membrane potential is described by

$$C_m \frac{dv}{dt} + I_L + I_{Na} + I_K + I_T + I_{SNr \rightarrow TC} + I_{CX \rightarrow TC} = 0 \quad (1)$$

87 with a leak current  $I_L = g_L[v - E_L]$ . The Na<sup>+</sup> current  $I_{Na} = g_{Na}m^3(v)h[v - E_{Na}]$  has an instantaneous  
 88 activation gating variable  $m_\infty(v) = \frac{1}{1 + \exp(-(v+37)/7)}$  and a slow inactivation gating variable  $h$  with  
 89  $\frac{dh}{dt} = \frac{h_\infty(v) - h}{\tau_h(v)}$  and steady-state  $h_\infty(v) = \frac{1}{1 + \exp((v+41)/4)}$  that is approached with a time constant  
 90  $\tau_h(v) = \frac{1}{a_h(v) + b_h(v)}$ ;  $a_h(v) = 0.128 \exp(-(v+46)/18)$ ,  $b_h(v) = \frac{4}{1 + \exp(-(v+84)/4)}$ .

91 The activation variable of the K<sup>+</sup> current  $I_K = g_K[0.75(1 - h)^4][v - E_K]$  is described in analogy to  
 92 the Na<sup>+</sup> inactivation variable ( $h$ ), which reduces the dimensionality of the model by one differential  
 93 equation (Rinzel, 1985a).

94 The T-type Ca<sup>2+</sup> current  $I_T = g_T p_\infty^2(v)r[v - E_T]$  has an instantaneous activation  $p_\infty(v) = \frac{1}{1 + \exp(-(v+60)/6.2)}$   
 95 and slow inactivation  $\frac{dr}{dt} = \frac{r_\infty(v) - r}{\tau_r(v)}$  with the steady-state  $r_\infty(v) = \frac{1}{1 + \exp((v+84)/4)}$  and time constant

96  $\tau_r(v) = 28 + 0.3(-(v + 25)/10.5)$ .

97 The T-type  $\text{Ca}^{2+}$  channel can cause post-inhibitory rebound spikes by the following mechanism.  
98 Prolonged hyperpolarisation leads to de-inactivation of the T-type  $\text{Ca}^{2+}$  channel, i.e. the inactivation  
99 gate ( $r$ ) opens while the activation gate ( $p$ ) closes. After shutting down the hyperpolarisation, the  
100 inactivation gate closes slowly whereas the activation gate opens very fast. Therefore, while both  
101 gates are open, the T-type  $\text{Ca}^{2+}$  channel briefly opens, leading to a membrane depolarisation. If  
102 this depolarisation is strong enough, this can lead to  $\text{Na}^+$  spikes, which are then referred to as  
103 post-inhibitory rebound spikes.

104 The thalamic model neuron receives two types of synaptic inputs; one inhibitory from the basal  
105 ganglia output region SNr ( $\text{SNr} \rightarrow \text{TC}$ ) and one excitatory from cortex ( $\text{CX} \rightarrow \text{TC}$ ). Synaptic  
106 currents  $I_X$  are described by a simple exponential decay with the decay rate  $\beta_X$ , where  $X$  denotes  
107 the synapse type (Gerstner and Kistler, 2002). Similar to the intrinsic ionic currents, each synaptic  
108 current is described in terms of the membrane potential  $v$ , channel conductance  $g_X$ , and the reversal  
109 potential  $v_X$ :  $I_X = g_X[v - v_X]\sum_j s_j$ ;  $X = \{\text{SNr} \rightarrow \text{TC}, \text{CX} \rightarrow \text{TC}\}$ . When a presynaptic neuron  $j$   
110 spikes at time  $t_i$ ,  $s_j$  becomes 1 and decays with time constant  $\beta$  afterwards  $\frac{ds_j}{dt} = (1 - s_j)\delta(t - t_i) -$   
111  $\beta_X s_j$ , where  $\delta(t)$  is the Dirac delta function. With the conductance caused by a single presynaptic  
112 spike ( $s_j = 1$ ) given by  $g_X$ , the net synaptic current is therefore the sum of all presynaptic events  $s_j$   
113 multiplied by  $g_X$  and the difference between the membrane potential and synaptic reversal potential.  
114 In our model, the reversal potential for the inhibitory synapse is  $v_{\text{SNr} \rightarrow \text{TC}} = -85\text{mV}$  (Rubin and  
115 Terman, 2004), which is required by the model to generate rebound spikes. This reversal potential,

116 though very hyperpolarised, is in the range of the reversal potentials of thalamocortical neurons in  
 117 the thalamus (Huguenard and Prince, 1994; Ulrich and Huguenard, 1997; Herd et al., 2013) and is  
 118 in line with the presence of thalamic rebound spikes in vivo (Kim et al., 2017). The intrinsic and  
 119 synaptic parameters of the model neuron are described in Table 1.

**Table 1.** Model parameters

| Parameter type                   | Parameter, value and unit                                                                                                                                  |
|----------------------------------|------------------------------------------------------------------------------------------------------------------------------------------------------------|
| Ionic channel conductance        | $g_L = 0.05 \text{ nS}/\mu\text{m}^2$<br>$g_{Na} = 3 \text{ nS}/\mu\text{m}^2$<br>$g_T = 5 \text{ nS}/\mu\text{m}^2$<br>$g_K = 5 \text{ nS}/\mu\text{m}^2$ |
| Ionic channel reversal potential | $E_L = -70 \text{ mV}$<br>$E_{Na} = 50 \text{ mV}$<br>$E_T = 0 \text{ mV}$<br>$E_K = -90 \text{ mV}$                                                       |
| Synaptic reversal potential      | $v_{SNr \rightarrow TC} = -85 \text{ mV}$<br>$v_{CX \rightarrow TC} = 0 \text{ mV}$                                                                        |
| Synaptic decay constant          | $\beta_{SNr \rightarrow TC} = 0.08 \text{ ms}^{-1}$<br>$\beta_{CX \rightarrow TC} = 0.18 \text{ ms}^{-1}$                                                  |

Parameters were taken from Rubin and Terman, 2004 and Ermentrout and Terman, 2010.

120 *Input spike trains*



121 We generated uncorrelated and correlated Poisson spike trains as inputs to the model neuron. To  
122 generate uncorrelated spike trains we simulated  $N$  independent Poisson processes, each with a  
123 firing rate  $r$ . We generated the correlated input spike trains for a given average pairwise correlation  
124 among them, denoted by  $\varepsilon$ . However, for  $N \geq 3$  different realisations of spike trains with different  
125 correlations of order 3 or higher are possible (Kuhn et al., 2003). For a convenient parametrisation  
126 of the order of correlation, we used the distribution of the number of coincident spikes, referred to  
127 as spike amplitudes ( $A$ ), in a model of interacting Poisson processes (Staudé et al., 2010). For a  
128 homogeneous population of spike trains, the average pairwise correlation depends on the first two  
129 moments of the amplitude distribution  $f_A$ :

$$\varepsilon = \frac{\frac{E[A^2]}{E[A]} - 1}{N - 1} \quad (2)$$

130 In the present study, we considered binomial and exponential amplitude distributions (Figure 1).  
131 While the binomial amplitude distribution has a high probability density around the mean of  
132 the distribution (Figure 1A), the exponential distribution has a higher probability density toward  
133 smaller amplitudes (Bujan et al., 2015, Figure 1B).

134 To generate spike trains with a binomial amplitude distribution we implemented a multiple  
135 interaction process (Kuhn et al., 2003, Figure 1A). For correlated outputs ( $\varepsilon > 0$ ), this was  
136 done by first generating a so-called “mother” spike train, a Poisson spike train with rate  $\lambda$ . We then  
137 took this mother spike train to derive the set of spike trains used in our simulations as convergent

138 inputs to the model neuron. Each spike train in this set was derived by randomly and independently  
139 copying spikes of the “mother” spike train with probability  $\varepsilon$ . The firing rate of each spike train  
140 generated via this algorithm is  $r = \varepsilon\lambda$ .

141 We also generated spike trains using exponentially distributed amplitudes described by:

$$f_A(\xi; \tau) = \frac{e^{-\tau\xi}}{\sum_{k=1}^N e^{-\tau k}}; \xi \in [1, N] \quad (3)$$

142 where  $f_A(\xi; \tau)$  is the amplitude distribution with the parameter  $\tau$ . According to Eq. 2, to compute  $\varepsilon$   
143 for this distribution, we needed to compute the proportion of the second moment to the first moment  
144 for this distribution. We used  $E[A^n] = \sum_{\xi=1}^N \xi^n f_A(\xi)$  to compute the first and second moments of  
145 the distribution and then applied it into Eq. 2, rewriting it to

$$\varepsilon = \frac{\frac{\sum_{\xi=1}^N \xi^2 e^{-\tau\xi}}{\sum_{\xi=1}^N \xi e^{-\tau\xi}} - 1}{N - 1} \quad (4)$$

146 This equation shows that  $\varepsilon$  depends on  $\tau$  and we took a simple numerical approach to find  $\tau$  for  
147 each desired  $\varepsilon$ . We computed  $\varepsilon$  for a range of  $\tau$  (from 0 to 5 with steps of 0.001) and then selected  
148 the  $\tau$  that yielded an  $\varepsilon$  closest to our desired  $\varepsilon$  (Figure 1C). The maximum error between the  $\varepsilon$  we  
149 calculated using Eq. 4 and the desired  $\varepsilon$  was  $5 \times 10^{-4}$ .

150 The next step was to generate the population spike trains using the probability distribution  
151 determined by the  $\tau$  we already computed. We drew  $N$  independent Poisson spike trains each

152 with rate  $r_\xi = Nrf_A(\xi)/\xi$ ;  $\xi \in [1, N]$ . Since  $\xi$  represents the number of coincident spikes in  
153 a time bin, spike times from independent spike trains should be copied  $\xi$  times to get the final  
154 population spike train used as inputs to the model neuron. As the amplitude distribution described  
155 in Eq. 3 has a high probability density toward lower amplitudes, high average pairwise correlations  
156 cannot be achieved. For typical parameters of the inhibitory input spike trains in this study ( $N = 30$ ,  
 $r = 50$  Hz), the maximum average pairwise correlation was less than 0.65 (Figure 1C).

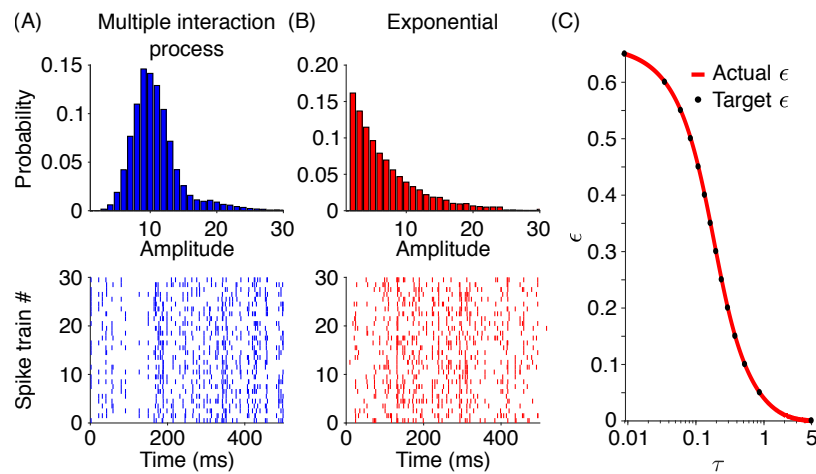

**Figure 1.** Generation of correlated Poisson spike trains used as input to the model neuron. (A, top) The amplitude distribution of the higher-order correlations was determined for spike trains generated by a multiple interaction process with  $\epsilon = 0.3$  and  $r = 50$  Hz. The bottom panel shows the raster plot of 30 respective example spike trains. (B, top) Alternatively, the amplitude distribution of higher-order correlations followed an exponential amplitude distribution with  $\epsilon = 0.3$  and  $r = 50$  Hz, and corresponding example spike trains (bottom panel). (C) The parameter  $\tau$  of the exponential amplitude distributions determined the resulting average pairwise correlation  $\epsilon$  (red trace). Black dots represent the average pairwise correlations that we used to generate input spike trains with an exponential amplitude distribution.

157

158 *Input spike trains with mixture of binomial and exponential amplitude distributions*

159 We computed the spike amplitude distribution of SNr model neurons using a large-scale network  
160 model of the basal ganglia (Figure 2D; see also below). This amplitude distribution involved a  
161 mixture of exponential and binomial distributions leading to an average pairwise correlation of  
162 0.6 (black dot in Figure 2). To obtain spike trains following this mixed distribution, we first  
163 created one spike train with an exponential amplitude distribution contributing 20% of the spikes  
164 with an average pairwise correlation of 0.25. Next, another spike train with a binomial amplitude  
165 distribution was generated (see above), contributing the remaining 80% of the spikes in the input  
166 spike train. We changed the average pairwise correlations of these input spike trains by only  
167 changing the average pairwise correlation of the subset with the binomial amplitude distribution.

168 *Uncorrelated input spike trains with gradual decrease*

169 We captured the gradual movement-related decrease, which is observed experimentally, by using  
170 a sigmoid function to describe the firing rate of the input spike trains as a function of time  $r(t) =$   
171  $50(1 - 1/[1 + e^{-a(t-t_{mov})}])$  Hz. We varied the slope parameter,  $a$ , to change the slope of the firing  
172 rate decrease.  $t_{mov}$  is the time point (in this study at one second), when the firing rate decreases to  
173 the half maximum, i.e.  $r(t_{mov}) = 25$  Hz.

174 *Data analysis: identifying rebound spikes*

175 The model neuron can fire spikes in response to excitatory input or due to release from inhibition

176 with post-inhibitory rebound spikes. Therefore, one challenge was to distinguish “normal”  
177 spikes driven by excitatory inputs from post-inhibitory rebound spikes. In mice studies, genetic  
178 approaches are often used to knockout T-type  $\text{Ca}^{2+}$  channels, which are critical for generation  
179 of post-inhibitory rebound spikes (Kim et al., 2017). We adopted this in our model by simply  
180 removing the T-type  $\text{Ca}^{2+}$  channels in our model (i.e.  $g_T = 0 \text{ nS}/\mu\text{m}^2$ ). However, this also caused  
181 changes in the intrinsic properties of the model neuron such as its excitability. We therefore took a  
182 more elaborate approach tailored to each of the two excitation scenarios, single excitatory spikes  
183 (Figure 5) and spontaneous excitation (Figure 6).

184 For the simulations with a single excitatory input spike the identification of rebound spikes was  
185 straightforward because the used excitatory strengths were subthreshold and thus could evoke  
186 no spikes. Therefore, we labelled all generated spikes as rebound spikes. However, for the  
187 simulations with ongoing excitation, the excitatory input was able to evoke “normal” spikes as  
188 well. To identify rebound spikes there, we simulated the model neuron with three different input  
189 combinations, inhibition-only, excitation-only and inhibition-excitation. For inhibition-only input,  
190 we determined the output firing rate of the model neuron purely due to rebound spiking ( $f_I$ ). In  
191 addition, we determined the time window in which the model neuron fired those rebound spikes  
192 (as this was typically in a short time window just after the movement-related decrease). We then  
193 compared the rebound-driven firing rate in this time window with the firing rate  $f_E$  obtained from an  
194 excitation-only simulation (i.e. without any inhibitory input, so no rebound spikes). Finally, we fed  
195 our model with both inputs (inhibition-excitation) and computed the firing rate in that time window,

196 which involved both rebound and non-rebound spiking ( $f_{EI}$ ). We then computed the proportion of  
197 rebound spiking as:  $\frac{f_{EI}-f_E}{f_I}$ .

#### 198 *Data analysis: transmission quality*

199 For our simulations shown in Figure 2, we needed to quantify the transmission quality for a variety  
200 of inputs strengths and degrees of correlation. For a clear transmission of the motor signal the  
201 thalamocortical neuron would ideally respond only to the movement-related decrease of activity  
202 in SNr neurons with a rebound spike, and be silent otherwise. Any rebound spike before the  
203 movement-related decrease would make the transmission noisy, in the sense that the decoding of  
204 the presence and timing of the motor signal in thalamic activity would be less accurate. Therefore,  
205 we used the number of spikes after the onset of the movement-related decrease, normalised by the  
206 total number of spikes within -1 s to 0.5 s around the onset of the movement-related decrease as a  
207 measure of the transmission quality.

#### 208 *Large-scale model of the basal ganglia*

209 We utilised a large-scale network model of the basal ganglia (Lindahl and Kotaleski, 2016) to  
210 compute the distribution of spike amplitudes in SNr during pathological activity in dopamine-depleted  
211 basal ganglia. This network model mimics the pathological activity pattern observed experimentally  
212 in a rat model of Parkinson's disease. To achieve the pathological activity pattern in SNr, we ran  
213 this model using a default parameter set originally from this network model. This parameter set  
214 involved setting dopamine modulation factor to zero and inducing a 20-Hz modulation to the

215 emulated cortical inputs to the basal ganglia regions (for details see Lindahl and Kotaleski, 2016).

#### 216 *Software packages*

217 We implemented the model neuron in Simulink, a simulation package in MATLAB (R2016b) and  
218 used a 4th-order Runge-Kutta method to numerically solve the differential equations (time step  
219 = 0.01 ms). We wrote all scripts to generate input spike trains, handle simulations and analyse  
220 and visualise the simulation data in MATLAB. To run the simulations we used the “NEMO”  
221 high-performance computing cluster in the state of Baden-Wuerttemberg (bwHPC) in Germany.

#### 222 *Code accessibility*

223 We provided our simulation scripts (in “BasicModelSimulations” directory) including the scripts  
224 generating input spike trains (in “SpikeTrains” directory) accessible via a git repository `https :`  
225 `//github.com/mmohaghegh/NigrothalamicTransmission.git`

## 226 **Results**

### 227 *Uncorrelated activity promotes the transmission of motor signals*

228 To determine whether uncorrelated activity in basal ganglia output is important for the transmission  
229 of motor signals, we simulated a thalamocortical neuron exposed to inhibitory Poisson input spike  
230 trains with varying degrees of correlation (Figure 2). We used binomial and exponential amplitude  
231 distributions to generate correlated Poisson spike trains (see Materials and Methods). In addition,

232 we modulated the input firing rate so that it mimicked the prominent movement-related decrease  
233 of basal ganglia output neurons observed in experimental studies (Hikosaka and Wurtz, 1983;  
234 Schultz, 1986; Leblois et al., 2007; Schmidt et al., 2013).

235 For uncorrelated inputs the model responded to the movement-related decrease with a single  
236 rebound spike (Figure 2A, left panel). However, for correlated inputs rebound spikes appeared  
237 not only after the movement-related decrease, but also at random times during baseline activity  
238 (Figure 2A, middle and right panels). The reason for this was that correlated SNr activity led not  
239 only to epochs with many synchronous spikes, but also to pauses in the population activity that  
240 were long enough to trigger rebound spikes.

241 In mammals multiple inhibitory projections from SNr converge on a single thalamocortical neuron  
242 (Edgerton and Jaeger, 2014), which affects the strength of the inhibition on the thalamocortical  
243 neuron. Since the degree of convergence is not known, we repeated our simulations for different  
244 inhibitory strengths, but found that the transmission quality did not depend on the inhibitory  
245 strength as long as the inhibition was strong enough to lead to rebound spikes (Figure 2D).  
246 Furthermore, as for more than two inputs the input spike trains cannot be uniquely characterised  
247 by pairwise correlations, we considered two different possibilities for higher-order correlations  
248 (see Materials and Methods). We found that the transmission quality strongly depended on both  
249 the input average pairwise correlation and higher-order correlations among input spike trains  
250 (Figure 2B).



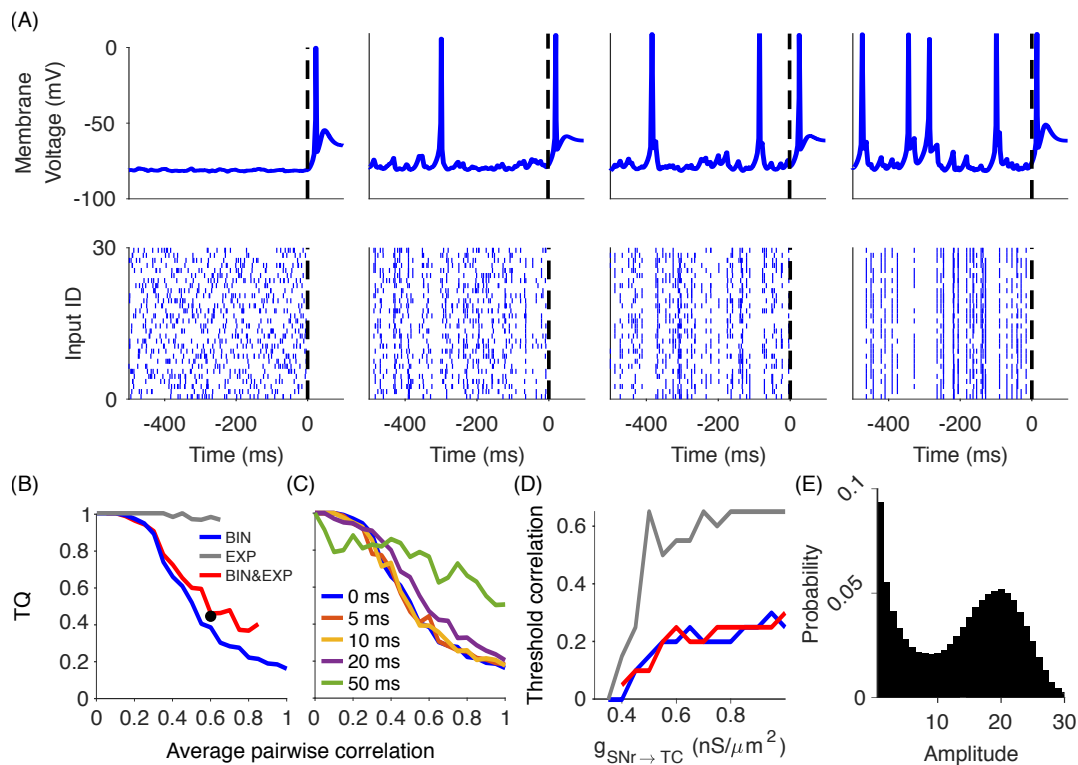

**Figure 2.** Input spike correlations impair the transmission quality (TQ) of motor signals from SNr to thalamus. (A) Top panels show the intracellular response of the thalamocortical model neuron to the inhibitory input spike trains from SNr displayed in the bottom panels. Uncorrelated Poisson spike trains ( $\epsilon = 0$ ) led to clear transmission (TQ = 1) via a single rebound spike after the firing rate decrease in the input (leftmost panel). Correlated Poisson spike trains, however, led to rebound spikes at random times, whenever there is a pause in the input spike trains (left middle panel:  $\epsilon = 0.2$  leading to TQ = 0.5, right middle panel:  $\epsilon = 0.35$  leading to TQ = 0.33 and rightmost panel:  $\epsilon = 0.7$  leading to TQ = 0.25). (B) Impact of input correlations on TQ depended on the correlation model (BIN, binomial; EXP, exponential; BIN&EXP, mixture of both). Note that the exponential amplitude distribution had a maximum average pairwise correlation of 0.65 (see Materials and Methods). The black dot marks the TQ for the spike trains generated using the amplitude distribution shown in (E). (C) For the binomial correlation model, jittering the input spike times decreased the TQ only for long jitter time windows (50ms), indicating that correlations on longer time scales are overall less detrimental. (D) The threshold correlation at which the transmission quality deteriorated (TQ < 0.95) only weakly depended on the inhibitory input strength (same legend as in B). (E) The simulation of Parkinson's disease in a large-scale model of the basal ganglia yielded an amplitude distribution of SNr spike times that corresponded to a mixture of the exponential and binomial amplitude distributions.

251 Pairwise correlations affected the transmission for a binomial amplitude distribution (Figure 2B,  
252 dark blue trace). For a binomial amplitude distribution higher-order events (“population bursts”)  
253 are common, which increases the probability for pauses in the population activity. Thereby, even  
254 weak correlations among SNr spike trains led to a sharp decrease in the transmission quality.  
255 In contrast, for spike train correlations with an exponential amplitude distribution, the decrease  
256 in transmission quality was less pronounced (Figure 2B, grey trace). This was because for the  
257 exponential amplitude distribution lower-order events are more common, which are not sufficient  
258 for pauses in the population activity of SNr neurons leading to thalamic rebound spikes. Therefore,  
259 in particular higher-order correlations may be detrimental for the transmission of motor commands.

260 We further investigated whether the substantial decrease in the transmission quality observed for the  
261 binomial amplitude distribution depended on millisecond synchrony of correlated spike times. We  
262 jittered the synchronous spike events using different time windows (Figure 2C), which corresponds  
263 to correlations on slower timescales. We found that the transmission quality decreased for jittering  
264 timescales  $\leq 20$  ms similar to inputs with correlations on a millisecond timescale (i.e. without  
265 jittering), confirming that the decrease in transmission quality does not depend on millisecond  
266 synchrony. However, correlations on the timescale of 50 ms did not substantially influence the  
267 transmission quality, as was expected due to the lack of population pauses.

268 The purpose of our simulation of correlated activity was to mimic basal ganglia output patterns in  
269 Parkinson’s disease. However, as the amplitude distribution of pathologically correlated activity  
270 in SNr is currently unknown, we employed a large-scale model of the basal ganglia (Lindahl and

271 Kotaleski, 2016), in which beta oscillations propagate through cortico-basal ganglia circuits (see  
272 Materials and Methods). Beta oscillations are widely observed in animals with dopamine-depleted  
273 basal ganglia including their output nuclei (Brown et al., 2001; Avila et al., 2010). While beta  
274 oscillations can be generated in the pallido-subthalamic loop (Mirzaei et al., 2017), here we did  
275 not assume a specific mechanism for the generation of correlated activity in Parkinson's disease,  
276 but focussed on the amplitude distribution in SNr in a simulation of Parkinson's disease. We  
277 found that the amplitude distributions in the dopamine-depleted state of the large-scale model were  
278 somewhere in between binomial and exponential (Figure 2E).

279 To investigate the model with a correlation structure that might be relevant for Parkinson's disease,  
280 we generated input spike trains based on a mixture of binomial and exponential distributions (see  
281 Materials and Methods). We then investigated the effect of different average pairwise correlations  
282 in this mixed distribution. We found that increasing the average pairwise correlation of the  
283 binomial component of the mixed distribution had a similar effect on the transmission quality as  
284 in the standard binomial amplitude distribution (Figure 2B, red and blue traces). Furthermore,  
285 for the average pairwise correlation found from the large-scale model for Parkinson's disease  
286 the transmission quality was low (Figure 2B, black dot). This confirms that under a correlation  
287 structure similar to Parkinson's disease, even weak correlations in basal ganglia output can impair  
288 the transmission of motor signals, potentially related to motor symptoms such as tremor or akinesia  
289 (Magnin et al., 2000; Edgerton and Jaeger, 2014; Kim et al., 2017).

290 *Uncorrelated activity increases transmission speed*

291 To study the effect of input correlations on transmission speed, we used the same scenario as  
292 above (Figure 2) and measured the time between the onset of the movement-related decrease and  
293 the rebound spike. We found that the transmission speed was fastest for no or weak correlations,  
294 and slower for stronger correlations (Figure 3A). Therefore, uncorrelated activity in basal ganglia  
295 output regions may also promote the fast transmission of motor signals. To generalise our findings  
296 on the transmission speed beyond the scenario using the movement-related decrease, we further  
297 examined transmission speed using (rebound) spike-triggered averages of inputs. Instead of  
298 simulating a movement-related decrease, we exposed the model neuron to inhibitory inputs with  
299 a constant firing rate. To compute the spike-triggered average, we used the peak of each rebound  
300 spike as the reference time point to compute the average of the preceding input. Since rebound  
301 spikes occurred more often for stronger input correlations, we performed this analysis on inputs  
302 having a correlation coefficient of either 0.3 or 1.0. These simulations confirmed that weak input  
303 correlations induce faster transmission than strong correlations (Figure 3C).

#### 304 *Uncorrelated activity decreases transmission variability*

305 For the transmission of motor signals via rebound spikes the trial-to-trial variability of the  
306 transmission speed may be important. For example, to coordinate motor signals across different  
307 neural pathways low variability (i.e. high precision) of the transmission speed might be necessary.  
308 To investigate the nigrothalamic transmission variability, we computed the variance over the  
309 latencies across 100 trials with movement-related decreases in SNr activity (i.e. the same scenario  
310 as in Figure 3A). We found that for uncorrelated inputs transmission was very precise in the

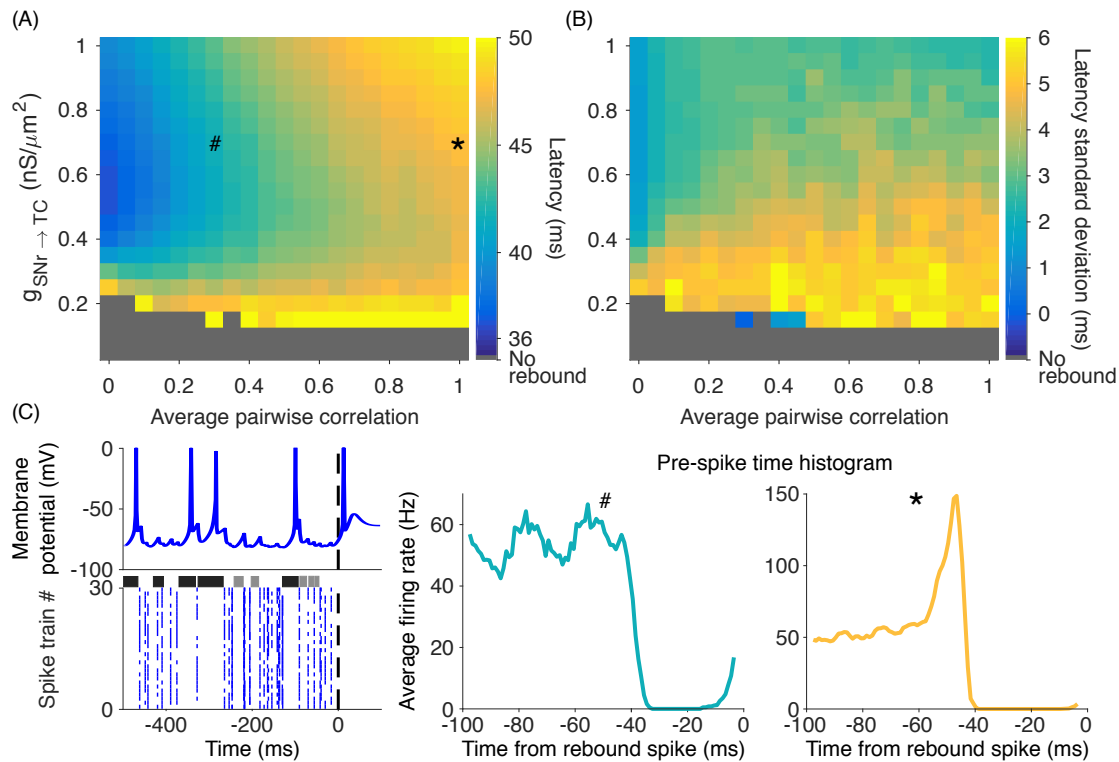

**Figure 3.** Correlated SNr spike trains decrease transmission speed and temporal precision of rebound spikes. Systematic investigation of average transmission latency (A) and its standard deviation (B) for different degrees of correlation and inhibitory strengths identified the range with fastest transmission speed and highest transmission precision, respectively. (C) Left panel shows a sample membrane potential ( $g_{SNr \rightarrow TC} = 0.70 \text{ nS}/\mu m^2$ ,  $\epsilon = 0.7$ ; top) of the thalamocortical model neuron and the corresponding inhibitory inputs (bottom). Note that rebound spikes were preceded by pauses in the input raster plot (indicated by black horizontal bars). However, for very short pauses (indicated by grey horizontal bars) no rebound spikes occurred. Averages triggered by rebound spikes for weakly correlated inputs (C, middle panel) and strongly correlated inputs (C, right panel) confirmed that pauses in the inhibitory input preceded rebound spikes. The duration of the pause preceding the rebound spikes reflected the transmission latency. The inset symbols (#, \*) in (A) indicate the parameters used for the corresponding spike-triggered averages in (C).

311 sense that the trial-to-trial variability of the response latency was small (Figure 3B). In contrast,  
312 even weak correlations led to a high transmission variability due to changes in the amount of  
313 hyperpolarisation caused by correlated inputs preceding rebound spikes. We conclude that  
314 uncorrelated inputs ensure a high precision of the transmission via rebound spikes by reducing  
315 the trial-to-trial variability in response latency.

316 *Sensory responses can promote or suppress rebound spiking*

317 SNr neurons often have short-latency responses to salient sensory stimuli characterised by brief  
318 increases in firing rate (Pan et al., 2013). In rats performing a stop-signal task these responses also  
319 occurred in neurons that decreased their activity during movement (Schmidt et al., 2013). This  
320 included responses to auditory stimuli, which cued the initiation of a movement (Go cue) or the  
321 cancellation of an upcoming movement (Stop cue). We examined how such brief increases in SNr  
322 activity affect rebound spiking in the thalamocortical model neuron (Figure 4). The thalamocortical  
323 model neuron received inputs similar to the SNr firing patterns recorded in rats during movement  
324 initiation (i.e. uncorrelated inputs with high baseline firing rate and a sudden movement-related  
325 decrease). To model sensory responses in the SNr neurons, we added a brief increase in firing rate  
326 at different time points relative to the movement-related decrease (Figure 4A). We generated the  
327 brief increase by adding a single spike in each spike train having the sensory response at the desired  
328 time point. This allowed us to observe the effect of the timing of sensory responses on rebound  
329 spiking.

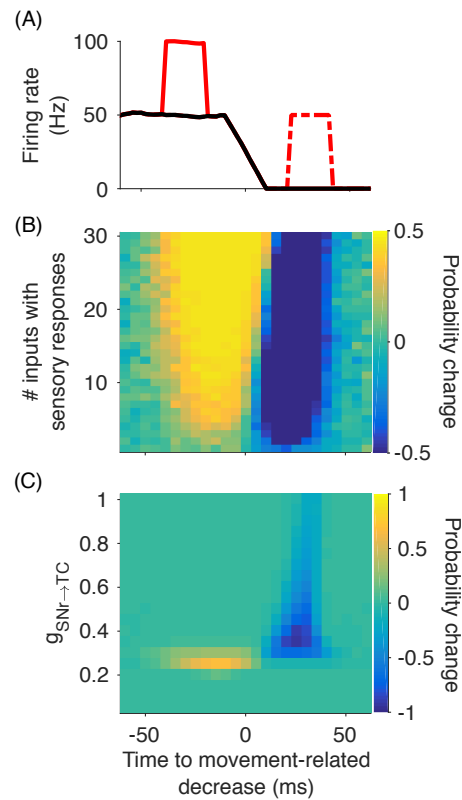

**Figure 4.** Sensory responses in SNr firing rate change the probability of rebound spikes in the thalamocortical model neuron. (A) The simulations used an average firing rate as input, which reflected the SNr firing rate with a movement-related decrease (black line). Sensory responses (red lines) were then added to the input at different time points relative to the movement-related decrease. Here two example timings are shown, before (solid) and after (dash-dot) the movement-related decrease. (B) The timing of the sensory responses relative to the movement-related decrease was varied systematically (x-axis). For a given relative timing, we determined whether rebound spikes were suppressed (blue area) or facilitated (yellow area; here  $g_{SNr \rightarrow TC} = 0.29 \text{ nS}/\mu\text{m}^2$ ). Note the large impact of the timing of the sensory response on the probability of rebound spikes, even if it occurred in only a small subset of neurons. (C) The input strength  $g_{SNr \rightarrow TC}$  affects the suppression and facilitation of rebound spikes. Here the change in rebound probability was averaged across the number of inputs with sensory responses (across y-axis in B).

330 To quantify the effect of sensory responses, we measured the difference in the probability of  
331 generating a rebound spike after the movement-related decrease in simulations with and without  
332 sensory responses. Interestingly, the sensory responses could either increase or decrease the  
333 probability of generating a rebound spike, depending on their relative timing to the movement-related  
334 decrease (Figure 4B). For sensory responses preceding the movement-related decrease for up  
335 to 40 ms, the probability of generating a rebound spike was increased. This was because the  
336 sensory response led to additional hyperpolarisation in the thalamocortical neuron, which promoted  
337 rebound spiking. In contrast, for sensory responses occurring 10-40 ms after the movement-related  
338 decrease, the probability of generating a rebound spike was decreased. This was because the  
339 sensory response in that case partly prevented the movement-related pause of SNr firing. Together,  
340 this points to the intriguing possibility that sensory responses in SNr can have opposite effects on  
341 behaviour (either promoting or suppressing movement), depending on their timing (Figure 4B).  
342 This could explain why SNr neurons respond to both Go and Stop cues with a similar increase in  
343 firing rate (Schmidt et al., 2013; Mallet et al., 2016), a previously puzzling finding (see Discussion).

344 In addition to the timing of sensory responses relative to the movement-related decrease, also the  
345 inhibitory input strength modulated the probability of generating a rebound spike (Figure 4C).  
346 For weaker inhibitory inputs ( $g_{SNr \rightarrow TC} = 0.25nS/\mu m^2$ ), the probability of generating a rebound  
347 spike was increased because the additional inhibitory inputs contributed to the hyperpolarisation  
348 of the thalamocortical neuron. However, for slightly stronger inputs ( $g_{SNr \rightarrow TC} \geq 0.35nS/\mu m^2$ ), the  
349 sensory responses could not further facilitate rebound spiking because the probability of generating



350 a rebound spike was already one. Accordingly, sensory responses were most effective in reducing  
351 the probability of generating a rebound spike for medium input strengths (i.e. with a relatively  
352 high probability of generating a rebound spike). We found that the most effective strength for  
353 suppressing rebound spikes was at  $g_{SNr \rightarrow TC} = 0.35nS/\mu m^2$ . However, the suppressing effect  
354 vanished for  $g_{SNr \rightarrow TC} \geq 0.8nS/\mu m^2$  because for this strength the sensory responses themselves  
355 caused a hyperpolarization strong enough to trigger a rebound spike (Figure 4C). Therefore, the  
356 effect of sensory responses in SNr on motor signals strongly depended on the nigrothalamic  
357 connection strength.

#### 358 *Rebound spikes in the presence of excitation*

359 Having studied basic properties of rebound spiking in the model under somewhat idealised  
360 conditions, we next extended the model to account for further conditions relevant in vivo. For  
361 example, we have assumed so far that the thalamocortical neuron receives input from SNr neurons  
362 that decrease their activity during movement. However, electrophysiological recordings in SNr  
363 and other basal ganglia output neurons have also identified neurons that do not decrease their  
364 activity during movement (Schmidt et al., 2013). Therefore, we investigated the response of the  
365 thalamocortical model neuron in a scenario in which only a fraction of SNr inputs decreased their  
366 firing rates, while the remaining neurons did not change their rates (Figure 5). We found that the  
367 thalamocortical model neuron elicited a rebound spike with high probability only when a large  
368 fraction of input neurons decreased their firing rates to zero (Figure 5A).

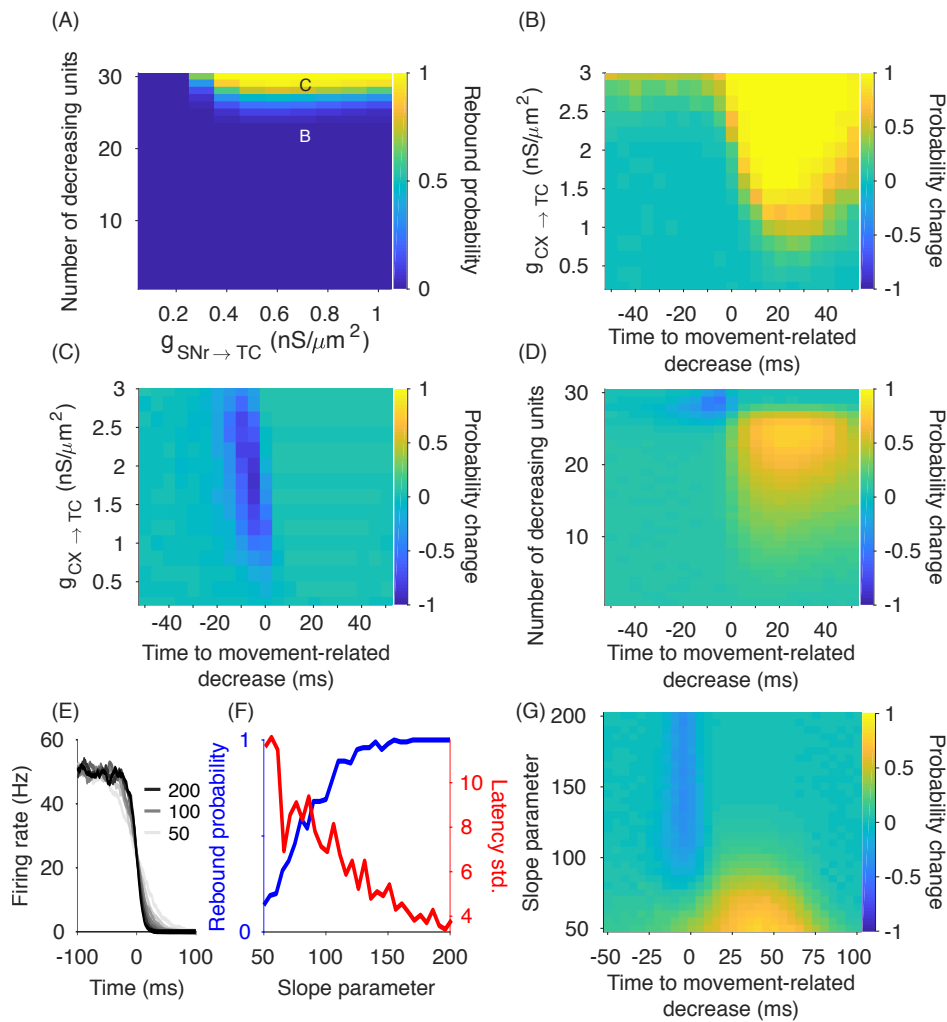

**Figure 5.** Effect of excitatory input spike timing on rebound spiking. (A) Rebound spikes occurred only when a large fraction of inhibitory input spike trains exhibited a movement-related decrease in firing rate, even for strong inhibitory inputs. (B) Single excitatory input spikes increased the probability of rebound spikes compared to pure inhibitory inputs (letter “B” in panel A) when they were presented briefly after the movement-related decrease (x-axis). Note that this occurred in a regime, in which usually no rebound spike were generated because not enough neurons decreased their firing rate (here 22 out of 30). (C) In contrast, in a regime in which rebound spikes were often generated (letter “C” in panel A), adding a single excitatory spike as input to the thalamocortical neuron decreased the probability of rebound spikes compared to pure inhibitory inputs, when they were presented briefly before the movement-related decrease (x-axis). (D) Systematic investigation of the parameter space indicated a narrow regime, in which single excitatory spikes can decrease, and a larger regime, in which they can increase the probability of a rebound spike. The change in probability was averaged over excitatory input strengths (i.e. over the y-axis in B and C). (E) SNr firing rate decreases with different slopes were generated by varying the indicated slope parameter  $a$  (see Methods). (F) Smaller SNr firing rate slopes reduced the probability of rebound spikes and increased the standard deviation of the rebound spike latencies across trials. (G) Single excitatory input spikes typically decreased the probability of rebound spikes for steep movement-related decreases in firing rate (i.e. high slopes), and increased the probability of rebound spikes for more gradual decreases.

369 The large fraction of SNr neurons required to exhibit a movement-related decrease in order  
370 to elicit a rebound spike downstream constrains the scenario under which this transmission is  
371 plausible in vivo. However, in a more realistic scenario the thalamocortical neuron also receives  
372 excitatory inputs (e.g. from cortex). Therefore, we examined whether excitatory input can, under  
373 some conditions, enhance the transmission via rebound spiking (Figure 5B-D). Importantly, the  
374 excitatory inputs should be weak enough in order not to elicit spikes themselves. We simulated  
375 the model neuron by adding a single excitatory input spike with variable timing with respect  
376 to the movement-related decrease in the inhibitory inputs, and observed whether it promoted or  
377 suppressed rebound spikes. We investigated the effect of the excitatory spike on the probability of  
378 generating a rebound spike by comparing a simulation including excitatory and inhibitory inputs  
379 with a simulation that included only inhibitory inputs. We found that for parameter regions in  
380 which the probability of generating a rebound spike was usually small (i.e. in the dark blue region  
381 in Figure 5A), additional excitatory spikes after the movement-related decrease increased the  
382 rebound probability (Figure 5B). We confirmed that these spikes in the thalamocortical neuron are  
383 actually rebound spikes (and not just driven by the excitatory input; see Materials and Methods).  
384 However, for strong excitation, the thalamocortical model neuron spiked also before the SNr  
385 movement-related decrease, indicating that these spikes were no longer rebound spikes.

386 For parameter regions in which the probability of generating a rebound spike was high (i.e. outside  
387 the dark blue region in Figure 5A), the excitatory input spikes could also suppress the generation of  
388 rebound spikes when they occurred before the movement-related decrease (Figure 5C). In contrast,

389 when the excitatory input spike occurred after the movement-related decrease, it enhanced the  
390 probability of generating a rebound spike. Therefore, similar to the complex effect of sensory  
391 responses in SNr neurons described above, also the excitatory input to the thalamocortical neurons  
392 could either promote or prevent rebound spikes depending on its timing. Furthermore, if only a  
393 fraction of SNr neurons exhibited a movement-related decrease, precisely timed excitatory input  
394 could promote the transmission of the motor command to the thalamocortical neuron (Figure 5D).  
395 Overall, our simulations indicate that rebound spikes can occur in a broad parameter regime  
396 that also includes excitation. Furthermore, precisely timed excitation provides an additional  
397 rich repertoire of rebound spike modulation, either promoting or suppressing movement-related  
398 rebound spikes.

#### 399 *Role of the slope of the movement-related decrease*

400 So far we assumed that the movement-related decreases in SNr firing rate are abrupt. However,  
401 electrophysiological recordings in rodents (Schmidt et al., 2013) and non-human primates (Hikosaka  
402 and Wurtz, 1983; Schultz, 1986; Leblois et al., 2007) indicate that, at least in data averaged over  
403 trials, the firing rate decreases can also be more gradual. Therefore, we investigated the impact  
404 of input spike trains with various slopes (see Methods) on rebound spikes (Figure 5E). We found  
405 that steep slopes of the movement-related firing rate decrease led to rebound spikes with high  
406 probability and small timing variability (Figure 5F). In contrast, more gradual movement-related  
407 decreases reduced the probability of rebound spikes and increased the spike timing variability.

408 We further investigated the impact of single excitatory spikes (similar to above) on the probability  
409 of rebound spikes for different SNr firing rate slopes (Figure 5G). We found that, if the slope  
410 was too small to reliably evoke rebound spikes (low rebound probability), excitatory spikes briefly  
411 after the onset of the movement-related decrease could increase the probability of rebound spikes.  
412 In contrast, for steeper slopes, the probability of rebound spikes decreased when the excitatory  
413 spike occurred before the movement-related decrease. These results further support that excitation  
414 can powerfully modulate rebound spiking and promote rebound spikes even under circumstances  
415 in which the inhibitory input characteristics are by themselves insufficient for the generation of  
416 rebound spikes.

417 *Transmission modes revisited: prevalence of rebound spiking*

418 The interaction of excitation and inhibition in thalamocortical neurons is important because even  
419 weak excitation may change the transmission mode from rebound to disinhibition (Goldberg et  
420 al., 2013). As we observed rebound spiking in the presence of single excitatory spikes (Figure 5),  
421 we further investigated how ongoing excitation affects the mode of nigrothalamic transmission.  
422 As before, we simulated the model neuron with movement-related inhibitory inputs, but added  
423 a background excitation in the form of a Poisson spike train with the firing rate of 100 Hz and  
424 examined the effect of changing excitatory strength (Figure 6). In an idealised scenario the model  
425 neuron spikes exclusively after the SNr movement-related decrease for both the rebound and  
426 disinhibition transmission modes. These spikes are either post-inhibitory rebound spikes (in the  
427 rebound mode), or the result of depolarisation through excitation (in the disinhibition mode).

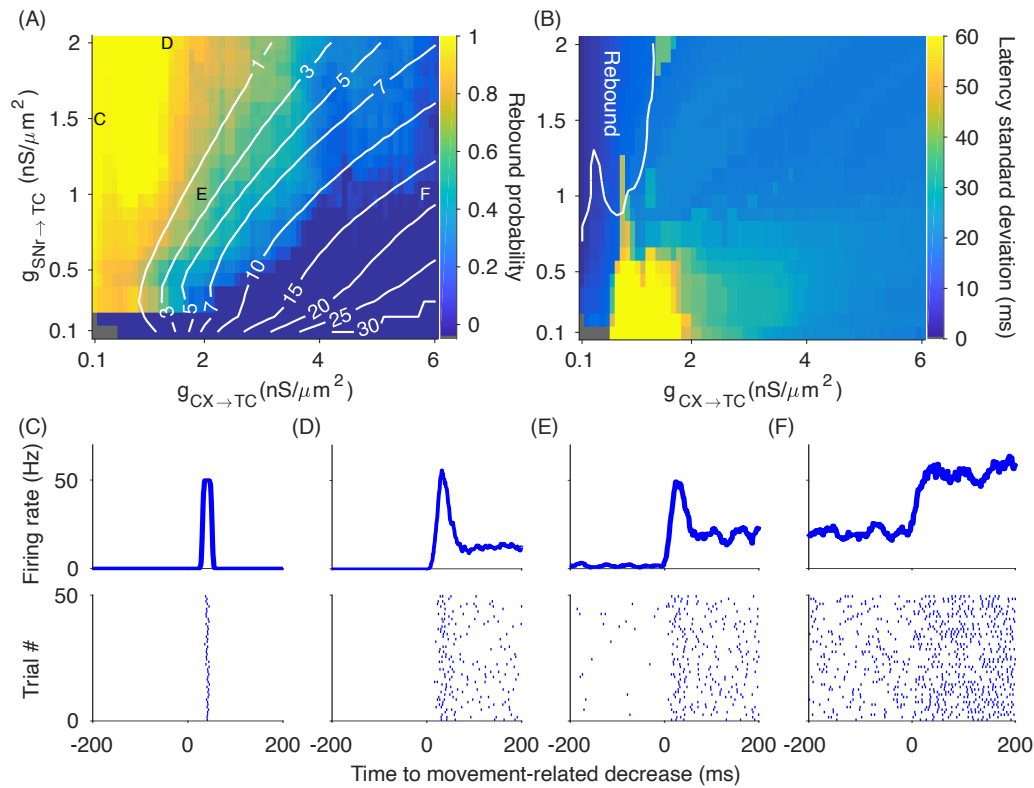

**Figure 6.** Smooth transition from rebound to disinhibition transmission mode. (A) The probability of rebound spikes only gradually decreased with stronger excitatory inputs, indicating a large parameter regime in which the rebound and disinhibition transmission modes coexisted. The yellow area marks the regime in which transmission was exclusively mediated by rebound spiking, while in dark blue areas the basal ganglia output only disinhibited cortical excitation. The white isolines illustrate the baseline firing rate of the model neuron (i.e. the firing rate before the onset of the movement-related decrease in the input). In the small grey region (bottom left) the model neuron did not fire. (B) The standard deviation of the latency (across trials) of the first thalamocortical spike relative the movement-related decrease distinguished rebound from disinhibition transmission modes. For the rebound mode (i.e. yellow area in A) the standard deviation was almost always the lowest, and the regime in which rebound and disinhibition coexisted the standard deviation was markedly higher. White contour line shows the boundaries of the yellow area in panel (A), where the transmission was exclusively mediated by rebound spiking. (C-E) Sample firing rate profiles and corresponding raster plots show the activity of the thalamocortical neuron in different parts of the parameter regime (as indicated by the corresponding letters in A) with rebound spiking only (C), coexistence of rebound and disinhibition (D-E) and disinhibition only (F).

428 However, we found that rebound and disinhibition modes could also coexist in regimes in which  
429 the model neuron has non-zero baseline firing rates (Figure 6A).

430 We characterised the nigrothalamic transmission mode (see Materials and Methods) according to  
431 the proportion of trials with rebound spikes for a range of inhibitory and excitatory inputs strengths  
432 (Figure 6A). Motor signals were transmitted via rebound spikes even in the presence of weak  
433 excitatory inputs ( $g_{CX \rightarrow TC} \leq 1.5 \text{ nS}/\mu\text{m}^2$ ; Figure 6A). Interestingly, the transition from rebound to  
434 disinhibition mode was not abrupt, but there was a region where disinhibition and rebound spikes  
435 coexisted (Figure 6B). In these overlapping regions rebound spiking seemed to be the dominant  
436 firing pattern with a strong, transient firing rate increase in response to the movement-related  
437 decrease, a phenomenon which was already observed in anaesthetised songbirds (Kojima and  
438 Doupe, 2009; Figure 6D, E; see also Discussion). We also examined the effects of varying the  
439 firing rate of the excitatory inputs (200, 500, and 1000 Hz). While the rebound and disinhibition  
440 spiking mode still overlapped, the corresponding parameter region was shifted towards lower  
441 excitatory conductances. For moderate excitatory input firing rates (100 and 200 Hz), rebound  
442 spiking occurred also in regions in which the model neuron was spontaneously active (Figure 6E).  
443 This overlap was present for spontaneous activity up to 3 Hz in line with the average spontaneous  
444 firing of motor thalamus neurons in rats during open-field behavior (Bosch-Bouju et al., 2014).  
445 However, for higher spontaneous activity ( $>7$  Hz) rebound spiking vanished (Figure 6F). We  
446 conclude that the model neuron can transmit motor signals in the rebound mode in the presence of  
447 excitatory inputs.

448 We also characterised the transmission precision for different transmission modes by computing  
449 the standard deviation of the timing of the first spike after the movement-related decrease across  
450 trials (Figure 6B). For the rebound transmission mode, the transmission precision was maximal  
451 (i.e. minimal timing standard deviation), but as the proportion of trials with disinhibition mode  
452 increased, the transmission precision decreased. In the weak inhibition and excitation regime,  
453 where rebound and disinhibition modes coexisted and the baseline firing rate of the model neuron  
454 was low ( $< 7$  Hz), the precision was smallest. This is important because the spiking variability  
455 can be characterised in electrophysiological recordings and may thus provide an indication of the  
456 transmission mode *in vivo*.

457 In summary, our computational model points to new functional roles for uncorrelated basal ganglia  
458 output in the clear transmission of motor signals. Furthermore, we have characterised how motor  
459 signals transmitted via rebound spikes could either be suppressed or promoted through sensory  
460 responses indicating that thalamocortical neurons may be a key site for the integration of sensory  
461 and motor signals. Finally, we showed that excitatory inputs to the thalamocortical neurons do not  
462 necessarily prevent rebound spiking, but may as well support the generation of rebound spikes.

## 463 **Discussion**

464 We used computational modelling to study the impact of spike train correlations in the basal  
465 ganglia output on the transmission of motor signals. Based on previous studies (Hikosaka  
466 and Wurtz, 1983; Schultz, 1986; Leblois et al., 2007; Schmidt et al., 2013), we focused our



467 description on movement-related pauses in SNr that potentially drive rebound spikes in motor  
468 thalamus. However, as e.g. also neurons in the superior colliculus can respond with a rebound  
469 spike after prolonged hyperpolarisation (Saito and Isa, 1999), our modelling results might  
470 apply more generally. Furthermore, while previous studies identified the important role of  
471 excitation in determining regimes in which rebound spikes can occur (Goldberg et al., 2013;  
472 Edgerton and Jaeger, 2014), our model produced rebound spikes in a wider parameter regime,  
473 also in the presence of excitation (Figure 6). In addition, rebound spiking overlapped with the  
474 disinhibition transmission mode, indicating that rebound spiking might apply more widely for  
475 nigrothalamic communication in line with recent experimental evidence (Kim et al., 2017). In  
476 our model, the impaired nigrothalamic transmission of motor signals for correlated inputs also  
477 indicates a potential functional role of active decorrelation in basal ganglia output regions (Wilson,  
478 2013).

#### 479 *Functional role of active decorrelation in the basal ganglia*

480 One prominent feature of neural activity in the healthy basal ganglia is the absence of spike  
481 correlations (Bar-Gad et al., 2003). This might be due to the autonomous pacemaking activity  
482 of neurons in globus pallidus externa/interna (GPe/GPi), subthalamic nucleus (STN) and SNr,  
483 as well as other properties of the network such as heterogeneity of firing rates and connectivity  
484 that actively counteracts the synchronisation of activity (Wilson, 2013). While uncorrelated  
485 basal ganglia activity may maximise information transmission (Wilson, 2015), our simulations  
486 demonstrate that it further prevents the occurrence of random pauses in SNr/GPi activity that

487 could drive thalamic rebound spikes. Thereby, uncorrelated basal ganglia output activity may  
488 ensure that rebound spikes in motor thalamus neurons occur only upon appropriate signals such  
489 as the movement-related decreases in basal ganglia output firing rate. In contrast, correlated basal  
490 ganglia output activity leads to rebound activity in motor thalamus also at baseline SNr activity,  
491 i.e. in absence of any motor signal. This decrease in the signal-to-noise ratio of motor signals may  
492 cause problems in motor control.

493 Evidence for the functional relevance of uncorrelated basal ganglia activity originates from the  
494 prominent observation that basal ganglia activity becomes correlated e.g. in Parkinson's disease  
495 (Bergman et al., 1998; Nevado-Holgado et al., 2014). Therefore, our simulations with correlated  
496 basal ganglia output activity capture a key aspect of neural activity in Parkinson's disease.  
497 Interestingly, our finding that basal ganglia correlations increase the rate of motor thalamus  
498 rebound spikes is in line with recent experimental findings. In dopamine-depleted mice with  
499 Parkinson-like motor symptoms, the rate of motor thalamus rebound spikes was also increased  
500 compared to healthy controls (Kim et al., 2017). Furthermore, an increased trial-to-trial variability  
501 of rebound spikes was found in dopamine-depleted mice, similar to our simulations (Figure 3).

502 Therefore, our results support a functional role for active decorrelation in the clear transmission  
503 of motor signals with low trial-to-trial variability from the basal ganglia to motor thalamus. In  
504 contrast, pathological correlations may lead to unreliable and noisy transmission of motor signals  
505 with high trial-to-trial variability, potentially contributing to motor symptoms in Parkinson's  
506 disease.

507 *Role of rebound spikes for motor output*

508 In our simulations we only examined the activity of a single thalamocortical neuron. However,  
509 for motor signals propagating further downstream, the coordination of activity among different  
510 thalamocortical neurons might be relevant. Due to the low trial-to-trial variability of the response  
511 latency of rebound spikes in the model (Fig. 6B), pauses in population SNr activity would  
512 lead to synchronous rebound spikes among thalamocortical neurons. In contrast, excitatory,  
513 Poisson inputs from cortex enhanced trial-to-trial variability (Fig. 6B) and thus would not lead to  
514 synchronous activity among thalamocortical neurons. Even though downstream regions cannot  
515 directly distinguish thalamic rebound spikes from excitation-driven spikes, they might read out  
516 synchronous activity that occurs primarily for rebound spikes. Thereby, only coordinated activity  
517 in different thalamocortical neurons may lead to movement initiation (Gaidica et al., 2018) or  
518 muscle contraction (Kim et al., 2017). This is in line with the experimental finding showing that,  
519 despite no significant difference in the peak or average firing rates of single unit recordings from  
520 intact and knockout neurons lacking T-type  $\text{Ca}^{2+}$  in the motor thalamus, multi unit recordings  
521 from intact neurons reached a stronger peak firing rate earlier than the knockout neurons (Kim  
522 et al., 2017). This early activation of a greater proportion of intact neurons after the termination  
523 of the inhibition, which indicates a coordinated activity across neurons, was accompanied by a  
524 muscular response whereas no muscular response was observed in the knockout state (Kim et al.,  
525 2017). Therefore, rebound activity in an individual motor thalamus neuron may not lead to muscle  
526 contraction, but instead synchronous rebound spikes in several motor thalamus neurons may be

527 required.

528 *Impact of sensory responses on the transmission of motor signals*

529 SNr neurons that decrease their activity during movement also respond to salient sensory stimuli  
530 such as auditory “Go” stimuli cueing movement (Pan et al., 2013; Schmidt et al., 2013). One  
531 proposed functional role for this brief firing rate increase is to prevent impulsive or premature  
532 responses during movement preparation in SNr neurons (Schmidt et al., 2013). In addition, in  
533 our model we observed that, depending on the precise timing, sensory responses may also promote  
534 thalamocortical rebound spikes and movement. This effect was present when the sensory responses  
535 preceded the movement-related decrease by up to 40 ms (Figure 4).

536 In rats performing a stop-signal task the same SNr neurons that responded to the “Go” stimulus  
537 also responded to an auditory “Stop” signal, which prompted the cancellation of the upcoming  
538 movement (Schmidt et al., 2013). These responses were observed in trials, in which the rats  
539 correctly cancelled the movement, but not in trials where they failed to cancel the movement.  
540 These SNr responses to the “Stop” signal may delay movement initiation, allowing another  
541 slower process to completely cancel the planned movement (Mallet et al., 2016). In line with  
542 this “pause-then-cancel” model of stopping (Schmidt and Berke, 2017), we observed that the  
543 SNr sensory responses can also prevent rebound spikes when they occur close to the time of the  
544 motor signal. In our model this suppression effect was present up to 40 ms after the onset of the  
545 movement-related decrease in SNr activity (Figure 4). Thereby, our model provides a prediction

546 for the temporal window of the functional contribution of sensory responses in SNr to behaviour.  
547 Importantly, sensory responses could either promote or suppress movements, depending on their  
548 relative timing to the motor signal, providing a highly flexible means to integrate sensory and  
549 motor signals in nigrothalamic circuits.

#### 550 *Effects of deep brain stimulation*

551 In our model correlated basal ganglia activity increased the number of rebound spikes in thalamocortical  
552 neurons. In particular, higher-order correlations lead to pauses in the SNr population activity  
553 promoting rebound spikes, while pairwise correlations alone did not affect the nigrothalamic  
554 transmission of motor signals (Figure 2B). This suggests that in Parkinson's disease higher-order  
555 correlations are relevant for motor symptoms, which offers some insight into the potential  
556 mechanisms by which deep-brain stimulation (DBS) might alleviate some of the motor symptoms  
557 such as rigidity and tremor. DBS in the STN and GPi has complex and diverse effects on the  
558 firing rate of neurons in SNr/GPi (Bar-Gad et al., 2004; Zimnik et al., 2015) and thalamus  
559 (Muralidharan et al., 2017). According to our model strong increases in SNr and GPi firing  
560 rates observed after STN DBS (Hashimoto et al., 2003; Maurice et al., 2003), would decrease  
561 the duration of the spontaneous pauses in the population activity (Figure 3C). Thereby, even  
562 for correlated SNr activity, the duration of the pauses would not be long enough to allow the  
563 generation of a rebound spike in the thalamocortical neuron. This conclusion also holds when a  
564 subset of neurons in SNr and GPi decrease their firing rate during STN DBS (Hahn et al., 2008;  
565 Humphries and Gurney, 2012). The decrease in the firing rate would decrease the degree of

566 correlation by eliminating or displacing the synchronous spike times and therefore weaken the  
567 inhibition preceding the pauses that could have potentially evoked rebound spikes.

### 568 *Integration of decision making systems*

569 In our model the generation of a rebound spike in thalamocortical neurons was strongly affected  
570 by single excitatory cortical input spikes (Figure 5). This means that the transmission of a basal  
571 ganglia motor signal could be prevented by a single, precisely-timed cortical spike preceding  
572 the SNr movement-related decrease by up to 20 ms (Figure 5C). This indicates a powerful  
573 mechanism by which cortex could affect basal ganglia motor output signals. It has previously  
574 been argued that different decision making systems, incorporating different strategies, might  
575 co-exist in the brain (Redgrave et al., 1999; Daw et al., 2005) and that the thalamus might be a key  
576 site for their integration (Haber and Calzavara, 2009). Our model offers a potential mechanism  
577 by which conflicts between different decision-making systems could be resolved. In this case  
578 the precisely-timed cortical excitation would allow the cancellation of a basal ganglia motor  
579 signal. Furthermore, it is possible that thalamocortical neurons integrate habitual and goal-directed  
580 decision systems (Daw et al., 2005; Redgrave et al., 2010), and that cancellation of basal ganglia  
581 motor signals serves as a means to prevent conflicting responses. Finally, the same mechanism for  
582 cancelling basal ganglia motor signals could also be used to exert cognitive control to overcome  
583 a habitual response. While this remains speculative at this point, our model provides a clear  
584 description of the inhibitory and excitatory inputs that would enable the modulation of a basal  
585 ganglia motor signal in thalamocortical neurons.

## 586 **Acknowledgements**

587 This work was supported by Erasmus Mundus joint PhD program (EuroSPIN), the BrainLinks-BrainTools  
588 Cluster of Excellence funded by the German Research Foundation (DFG, grant number: EXC  
589 1086), the EU H2020 Programme as part of the Human Brain Project (HBP-SGA1, 720270;  
590 HBP-SGA2, 785907), and the University of Sheffield. We also acknowledge support by the state  
591 of Baden-Wuerttemberg through bwHPC and the German Research Foundation (DFG) through  
592 grant no INST 39/963-1 FUGG. We would like to thank David Bilkey, Alejandro Jimenez, Lars  
593 Hunger, Amin Mirzaei, and Genela Morris for helpful discussions.

## 594 **Competing Interests**

595 The authors declare no competing financial interests.

## 596 **Author Contributions**

597 Mohammadreza Mohagheghi Nejad and Robert Schmidt designed the research. Robert Schmidt  
598 supervised the work. Mohammadreza Mohagheghi Nejad performed the simulations and analysed  
599 the data. Mohammadreza Mohagheghi Nejad, Stefan Rotter and Robert Schmidt interpreted the  
600 results and wrote the manuscript.

601 **References**

603 Albin RL, Young AB, Penney JB (1989) The functional anatomy of basal ganglia disorders.  
602  
604 *Trends in neurosciences* 12:366–375.

605 Alexander GE, Crutcher MD (1990a) Functional architecture of basal ganglia circuits: neural  
606 substrates of parallel processing. *Trends in neurosciences* 13:266–271.

607 Alexander GE, Crutcher MD (1990b) Neural representations of the target (goal) of visually guided  
608 arm movements in three motor areas of the monkey. *Journal of neurophysiology* 64:164–178.

609 Avila I, Parr-Brownlie LC, Brazhnik E, Castañeda E, Bergstrom DA, Walters JR (2010) Beta  
610 frequency synchronization in basal ganglia output during rest and walk in a hemiparkinsonian rat.  
611 *Experimental neurology* 221:307–319.

612 Bar-Gad I, Elias S, Vaadia E, Bergman H (2004) Complex locking rather than complete  
613 cessation of neuronal activity in the globus pallidus of a 1-methyl-4-phenyl-1, 2, 3,  
614 6-tetrahydropyridine-treated primate in response to pallidal microstimulation. *Journal of*  
615 *Neuroscience* 24:7410–7419.

616 Bar-Gad I, Heimer G, Ritov Y, Bergman H (2003) Functional correlations between  
617 neighboring neurons in the primate globus pallidus are weak or nonexistent. *Journal of*  
618 *Neuroscience* 23:4012–4016.



- 619 Bergman H, Feingold A, Nini A, Raz A, Slovin H, Abeles M, Vaadia E (1998) Physiological  
620 aspects of information processing in the basal ganglia of normal and parkinsonian primates.  
621 *Trends in neurosciences* 21:32–38.
- 622 Bosch-Bouju C, Hyland BI, Parr-Brownlie LC (2013) Motor thalamus integration of cortical,  
623 cerebellar and basal ganglia information: implications for normal and parkinsonian conditions.  
624 *Frontiers in computational neuroscience* 7:163.
- 625 Bosch-Bouju C, Smither RA, Hyland BI, Parr-Brownlie LC (2014) Reduced reach-related  
626 modulation of motor thalamus neural activity in a rat model of parkinson’s disease. *Journal*  
627 *of Neuroscience* 34:15836–15850.
- 628 Brown P, Oliviero A, Mazzone P, Insola A, Tonali P, Di Lazzaro V (2001) Dopamine dependency  
629 of oscillations between subthalamic nucleus and pallidum in parkinson’s disease. *Journal of*  
630 *Neuroscience* 21:1033–1038.
- 631 Bujan AF, Aertsen A, Kumar A (2015) Role of input correlations in shaping the variability and  
632 noise correlations of evoked activity in the neocortex. *Journal of Neuroscience* 35:8611–8625.
- 633 Daw ND, Niv Y, Dayan P (2005) Uncertainty-based competition between prefrontal and  
634 dorsolateral striatal systems for behavioral control. *Nature neuroscience* 8:1704.
- 635 Deniau J, Chevalier G (1985) Disinhibition as a basic process in the expression of striatal  
636 functions. ii. the striato-nigral influence on thalamocortical cells of the ventromedial thalamic  
637 nucleus. *Brain research* 334:227–233.

- 638 Edgerton JR, Jaeger D (2014) Optogenetic activation of nigral inhibitory inputs to motor thalamus  
639 in the mouse reveals classic inhibition with little potential for rebound activation. *Frontiers in*  
640 *Cellular Neuroscience* 8:36.
- 641 Ermentrout GB, Terman DH (2010) *Mathematical foundations of neuroscience*, Vol. 35 Springer  
642 Science & Business Media.
- 643 Gaidica M, Hurst A, Cyr C, Leventhal DK (2018) Distinct populations of motor thalamic neurons  
644 encode action initiation, action selection, and movement vigor. *Journal of Neuroscience* .
- 645 Gerstner W, Kistler WM (2002) *Spiking neuron models: Single neurons, populations, plasticity*  
646 Cambridge university press.
- 647 Goldberg JH, Farries MA, Fee MS (2012) Integration of cortical and pallidal inputs in the basal  
648 ganglia-recipient thalamus of singing birds. *Journal of neurophysiology* 108:1403–1429.
- 649 Goldberg JH, Farries MA, Fee MS (2013) Basal ganglia output to the thalamus: still a paradox.  
650 *Trends in neurosciences* 36:695–705.
- 651 Goldberg JH, Fee MS (2012) A cortical motor nucleus drives the basal ganglia-recipient thalamus  
652 in singing birds. *Nature neuroscience* 15:620–627.
- 653 Guo Y, Rubin JE, McIntyre CC, Vitek JL, Terman D (2008) Thalamocortical relay fidelity  
654 varies across subthalamic nucleus deep brain stimulation protocols in a data-driven computational  
655 model. *Journal of neurophysiology* 99:1477–1492.

- 656 Haber SN, Calzavara R (2009) The cortico-basal ganglia integrative network: the role of the  
657 thalamus. *Brain research bulletin* 78:69–74.
- 658 Hahn PJ, Russo GS, Hashimoto T, Miocinovic S, Xu W, McIntyre CC, Vitek JL (2008) Pallidal  
659 burst activity during therapeutic deep brain stimulation. *Experimental neurology* 211:243–251.
- 660 Hashimoto T, Elder CM, Okun MS, Patrick SK, Vitek JL (2003) Stimulation of the subthalamic  
661 nucleus changes the firing pattern of pallidal neurons. *Journal of neuroscience* 23:1916–1923.
- 662 Herd MB, Brown AR, Lambert JJ, Belelli D (2013) Extrasynaptic gabaa receptors couple  
663 presynaptic activity to postsynaptic inhibition in the somatosensory thalamus. *Journal of*  
664 *Neuroscience* 33:14850–14868.
- 665 Hikosaka O, Takikawa Y, Kawagoe R (2000) Role of the basal ganglia in the control of purposive  
666 saccadic eye movements. *Physiological reviews* 80:953–978.
- 667 Hikosaka O, Wurtz RH (1983) Visual and oculomotor functions of monkey substantia  
668 nigra pars reticulata. iv. relation of substantia nigra to superior colliculus. *Journal of*  
669 *neurophysiology* 49:1285–1301.
- 670 Huguenard J, Prince D (1994) Intrathalamic rhythmicity studied in vitro: nominal t-current  
671 modulation causes robust antioscillatory effects. *Journal of Neuroscience* 14:5485–5502.
- 672 Humphries MD, Gurney K (2012) Network effects of subthalamic deep brain stimulation  
673 drive a unique mixture of responses in basal ganglia output. *European journal of*  
674 *neuroscience* 36:2240–2251.

- 675 Kase D, Uta D, Ishihara H, Imoto K (2015) Inhibitory synaptic transmission from the substantia  
676 nigra pars reticulata to the ventral medial thalamus in mice. *Neuroscience research* 97:26–35.
- 677 Kim J, Kim Y, Nakajima R, Shin A, Jeong M, Park AH, Jeong Y, Jo S, Yang S, Park H  
678 et al. (2017) Inhibitory basal ganglia inputs induce excitatory motor signals in the thalamus.  
679 *Neuron* 95:1181–1196.
- 680 Kojima S, Doupe AJ (2009) Activity propagation in an avian basal ganglia-thalamocortical circuit  
681 essential for vocal learning. *Journal of Neuroscience* 29:4782–4793.
- 682 Kuhn A, Aertsen A, Rotter S (2003) Higher-order statistics of input ensembles and the response  
683 of simple model neurons. *Neural Computation* 15:67–101.
- 684 Laudes T, Meis S, Munsch T, Lessmann V (2012) Impaired transmission at corticothalamic  
685 excitatory inputs and intrathalamic gabaergic synapses in the ventrobasal thalamus of  
686 heterozygous bdnf knockout mice. *Neuroscience* 222:215–227.
- 687 Leblois A, Bodor ÁL, Person AL, Perkel DJ (2009) Millisecond timescale disinhibition  
688 mediates fast information transmission through an avian basal ganglia loop. *Journal of*  
689 *Neuroscience* 29:15420–15433.
- 690 Leblois A, Meissner W, Bezard E, Bioulac B, Gross CE, Boraud T (2006) Temporal and spatial  
691 alterations in gpi neuronal encoding might contribute to slow down movement in parkinsonian  
692 monkeys. *European Journal of Neuroscience* 24:1201–1208.

693 Leblois A, Meissner W, Bioulac B, Gross CE, Hansel D, Boraud T (2007) Late emergence of  
694 synchronized oscillatory activity in the pallidum during progressive parkinsonism. *European*  
695 *Journal of Neuroscience* 26:1701–1713.

696 Lindahl M, Kotaleski JH (2016) Untangling basal ganglia network dynamics and  
697 function—role of dopamine depletion and inhibition investigated in a spiking network model.  
698 *eneuro* pp. ENEURO–0156.

699 Llinás R, Jahnsen H (1982) Electrophysiology of mammalian thalamic neurones in vitro.  
700 *Nature* 297:406.

701 Magnin M, Morel A, Jeanmonod D (2000) Single-unit analysis of the pallidum, thalamus and  
702 subthalamic nucleus in parkinsonian patients. *Neuroscience* 96:549–564.

703 Mallet N, Schmidt R, Leventhal D, Chen F, Amer N, Boraud T, Berke JD (2016) Arkypallidal  
704 cells send a stop signal to striatum. *Neuron* 89:308–316.

705 Maurice N, Thierry AM, Glowinski J, Deniau JM (2003) Spontaneous and evoked activity of  
706 substantia nigra pars reticulata neurons during high-frequency stimulation of the subthalamic  
707 nucleus. *Journal of Neuroscience* 23:9929–9936.

708 Mirzaei A, Kumar A, Leventhal D, Mallet N, Aertsen A, Berke J, Schmidt R (2017) Sensorimotor  
709 processing in the basal ganglia leads to transient beta oscillations during behavior. *Journal of*  
710 *Neuroscience* 37:1289–17.

- 711 Muralidharan A, Zhang J, Ghosh D, Johnson MD, Baker KB, Vitek JL (2017) Modulation of  
712 neuronal activity in the motor thalamus during gpi-dbs in the mptp nonhuman primate model of  
713 parkinson's disease. *Brain stimulation* 10:126–138.
- 714 Nevado-Holgado AJ, Mallet N, Magill PJ, Bogacz R (2014) Effective connectivity of the  
715 subthalamic nucleus–globus pallidus network during parkinsonian oscillations. *The Journal of*  
716 *physiology* 592:1429–1455.
- 717 Pan WX, Brown J, Dudman JT (2013) Neural signals of extinction in the inhibitory microcircuit  
718 of the ventral midbrain. *Nature neuroscience* 16:71.
- 719 Person AL, Perkel DJ (2005) Unitary ipsp drive precise thalamic spiking in a circuit required for  
720 learning. *Neuron* 46:129–140.
- 721 Person AL, Perkel DJ (2007) Pallidal neuron activity increases during sensory relay through  
722 thalamus in a songbird circuit essential for learning. *Journal of Neuroscience* 27:8687–8698.
- 723 Redgrave P, Prescott TJ, Gurney K (1999) The basal ganglia: a vertebrate solution to the selection  
724 problem? *Neuroscience* 89:1009–1023.
- 725 Redgrave P, Rodriguez M, Smith Y, Rodriguez-Oroz MC, Lehericy S, Bergman H, Agid Y,  
726 DeLong MR, Obeso JA (2010) Goal-directed and habitual control in the basal ganglia:  
727 implications for parkinson's disease. *Nature Reviews Neuroscience* 11:760.
- 728 Reitsma P, Doiron B, Rubin JE (2011) Correlation transfer from basal ganglia to thalamus in  
729 parkinson's disease. *Frontiers in computational neuroscience* 5:58.

730 Rinzel J (1985a) Excitation dynamics: insights from simplified membrane models In *Fed. Proc.*,  
731 Vol. 44, pp. 2944–2946.

732 Rinzel J (1985b) Excitation dynamics: insights from simplified membrane models In *Fed. Proc.*,  
733 Vol. 44, pp. 2944–2946.

734 Rubin JE, Terman D (2004) High frequency stimulation of the subthalamic nucleus eliminates  
735 pathological thalamic rhythmicity in a computational model. *Journal of computational*  
736 *neuroscience* 16:211–235.

737 Saito Y, Isa T (1999) Electrophysiological and morphological properties of neurons in the rat  
738 superior colliculus. i. neurons in the intermediate layer. *Journal of neurophysiology* 82:754–767.

739 Schmidt R, Berke JD (2017) A pause-then-cancel model of stopping: evidence from basal ganglia  
740 neurophysiology. *Phil. Trans. R. Soc. B* 372:20160202.

741 Schmidt R, Leventhal DK, Mallet N, Chen F, Berke JD (2013) Canceling actions involves a race  
742 between basal ganglia pathways. *Nature neuroscience* 16:1118.

743 Schultz W (1986) Activity of pars reticulata neurons of monkey substantia nigra in relation to  
744 motor, sensory, and complex events. *Journal of Neurophysiology* 55:660–677.

745 Staude B, Grün S, Rotter S (2010) Higher-order correlations and cumulants In *Analysis of parallel*  
746 *spike trains*, pp. 253–280. Springer.

- 747 Ulrich D, Huguenard JR (1997) Nucleus-specific chloride homeostasis in rat thalamus. *Journal*  
748 *of Neuroscience* 17:2348–2354.
- 749 Wichmann T, DeLong MR (1996) Functional and pathophysiological models of the basal ganglia.  
750 *Current opinion in neurobiology* 6:751–758.
- 751 Wilson CJ (2013) Active decorrelation in the basal ganglia. *Neuroscience* 250:467–482.
- 752 Wilson CJ (2015) Oscillators and oscillations in the basal ganglia. *The Neuroscientist* 21:530–539.
- 753 Yin HH, Knowlton BJ (2006) The role of the basal ganglia in habit formation. *Nature Reviews*  
754 *Neuroscience* 7:464.
- 755 Zimnik AJ, Nora GJ, Desmurget M, Turner RS (2015) Movement-related discharge in the  
756 macaque globus pallidus during high-frequency stimulation of the subthalamic nucleus. *Journal*  
757 *of Neuroscience* 35:3978–3989.
